# Supplementary material for: Feasibility of an Application-Based Outpatient Rehabilitation Program for Stroke Survivors: Acceptability and Preliminary Results for Patient-Reported Outcomes
Source: MDPI journal article supplement (doi:10.3390/bioengineering11020135), 2024-01-29
Supplement: s1 [file s1]

**Table S1.** Further characteristics.

| Characteristic       | Frequency (in %)                |
|----------------------|---------------------------------|
| Number of medication | No medication                   |
|                      | 13.2%                           |
|                      | 1 to 4                          |
| Medication Groups    | 44.7%                           |
|                      | ≥5                              |
|                      | 42.1%                           |
| Medication Groups    | Analgetic                       |
|                      | 7.9%                            |
|                      | Antihypertensive                |
|                      | 55.3%                           |
|                      | Antiplatelets/Anticoagualtes    |
|                      | 71.1%                           |
|                      | Statins                         |
|                      | 42.1%                           |
|                      | Anti-diabetic                   |
|                      | 7.9%                            |
|                      | Anti-depressants                |
|                      | 26.3%                           |
|                      | Anti-inflammatory               |
|                      | 7.9%                            |
|                      | Cholesterol-lowering medication |
|                      | 2.6%                            |
|                      | Thyroid medication              |
|                      | 5.3%                            |
|                      | Proton pump inhibitors          |
|                      | 21.1%                           |
| Comorbidities        | Anti-rheumatic                  |
|                      | 2.6%                            |
|                      | Anti-epileptic                  |
|                      | 5.3%                            |
|                      | Muscle relaxant                 |
|                      | 15.8%                           |
|                      | Immunosuppressiva               |
|                      | 2.6%                            |
|                      | Other                           |
|                      | 26.3%                           |
|                      | No comorbidities                |
|                      | 14.8 %                          |
|                      | Diabetes                        |
|                      | 18.5 %                          |
|                      | Peripheral vascular             |
|                      | 14.8 %                          |
|                      | Cerebrovascular disease         |
|                      | 18.5 %                          |
|                      | Congestive heart failure        |
|                      | 11.1 %                          |
|                      | Respiratory disease             |
|                      | 7.4 %                           |
|                      | Tumor                           |
|                      | 11.1 %                          |
|                      | Rheumatologic disease           |
|                      | 18.5 %                          |
|                      | Musculoskeletal problems        |
|                      | 18.5 %                          |
|                      | Renal disease                   |
|                      | 7.4 %                           |
|                      | Psychiatric problems            |
|                      | 11.1 %                          |
|                      | Other                           |
|                      | 18.5 %                          |
|                      | missing <i>n</i> = 11           |
| Affected areas       | Gait                            |
|                      | 78.9%                           |
|                      | Hand and arm function           |
|                      | 71.1%                           |
|                      | Concentration and/or memory     |
|                      | 57.9%                           |
|                      | Pain                            |
|                      | 36.8%                           |
| Affected areas       | Mood                            |
|                      | 39.5%                           |
|                      | Speaking                        |
|                      | 34.2%                           |
|                      | Vision                          |
|                      | 31.6%                           |
|                      | Other                           |
|                      | 15.8%                           |

Legend: Self-reported information. Multiple responses were possible.

**Table S2.** Analysis of SF-36 pre- and post-intervention results ( $n = 38$ ).

|                                          | pre             | post            | Statistics |            |                       |         |
|------------------------------------------|-----------------|-----------------|------------|------------|-----------------------|---------|
|                                          | M $\pm$ SD      | M $\pm$ SD      | df         | t-Test     | Wilcoxon signed-rank  | p-value |
| Bodily Pain                              | 61.8 $\pm$ 26.6 | 68.0 $\pm$ 23.2 | 37         | NA         | W = 83.5, z = -1.900  | 0.059   |
| Physical Functioning                     | 51.7 $\pm$ 25.9 | 60.8 $\pm$ 26.6 | 35         | NA         | W = 91.5, z = -2.725  | 0.006   |
| Mental Health                            | 59.9 $\pm$ 23.6 | 71.9 $\pm$ 18.6 | 36         | t = -4.249 | NA                    | <0.001  |
| Role limitations due to emotional health | 57.9 $\pm$ 45.0 | 63.6 $\pm$ 46.2 | 37         | NA         | W = 91.0, z = -0.523  | 0.607   |
| Vitality                                 | 44.4 $\pm$ 21.9 | 57.0 $\pm$ 20.5 | 37         | t = -5.572 | NA                    | <0.001  |
| Social functioning                       | 66.7 $\pm$ 31.1 | 73.6 $\pm$ 26.7 | 35         | NA         | W = 93.0, z = -1.088  | 0.265   |
| General health                           | 52.8 $\pm$ 15.4 | 53.1 $\pm$ 18.4 | 37         | NA         | W = 270.5, z = -0.729 | 0.468   |
| Role limitations due to physical health  | 37.5 $\pm$ 35.7 | 45.6 $\pm$ 42.6 | 37         | -1.107     | NA                    | 0.275   |

Legend: Bold are statistically significant results; df = degrees of freedom, t-test or Wilcoxon signed-rank test.

**Table S3.** General health questions results pre- and post-intervention ( $n = 38$ ).

|               | Pre      | post     | Statistics (Wilcoxon Signed Rank-Test) |       |        |       |
|---------------|----------|----------|----------------------------------------|-------|--------|-------|
| [0–10]        | Md [IQR] | Md [IQR] | df                                     | W     | z      | p     |
| Walking       | 6 [3]    | 7 [4]    | 36                                     | 89.0  | -2.197 | 0.027 |
| Speaking      | 9 [1]    | 9 [3]    | 36                                     | 107.0 | -0.295 | 0.769 |
| Mood          | 8 [4]    | 8 [3]    | 36                                     | 104.5 | -1.803 | 0.066 |
| Vision        | 8 [3]    | 8 [3]    | 36                                     | 151.0 | -0.913 | 0.358 |
| concentration | 7 [4.25] | 8 [3]    | 35                                     | 90.5  | -1.937 | 0.048 |
| Sleep         | 8 [4]    | 8 [2]    | 36                                     | 193.0 | -1.078 | 0.267 |

|                |       |       |    |       |        |       |
|----------------|-------|-------|----|-------|--------|-------|
| Current health | 6 [3[ | 7 [2] | 36 | 141.0 | -1.882 | 0.052 |
| memory         | 7 [4] | 8 [4] | 35 | 142.0 | -0.851 | 0.394 |

Legend: df = degrees of freedom; Md = Median; IQR = interquartile range.

**Table 4.** Pre- and post-intervention results of the Timed Up and Go test and walking speed.

|                        |                                        | Total ( <i>n</i> = 38)         | MRS 1 ( <i>n</i> = 11)       | MRS 2 ( <i>n</i> = 23)        | MRS 3, 4 ( <i>n</i> = 4)      |
|------------------------|----------------------------------------|--------------------------------|------------------------------|-------------------------------|-------------------------------|
|                        |                                        | M ± SD                         | M ± SD                       | M ± SD                        | M ± SD                        |
| Timed Up and Go (in s) | pre                                    | 13.3 ± 4.9                     | 11.4 ± 4.9                   | 13.0 ± 3.8                    | 20.1 ± 5.7                    |
|                        | post                                   | 14.2 ± 9.9                     | 9.4 ± 2.3                    | 13.6 ± 5.5                    | 30.8 ± 22.5                   |
|                        | Statistics (Wilcoxon signed-rank test) | W = 303.5, p = 0.857           | W = 35, p = 0.476            | W = 107, p = 0.781            | NA                            |
| Gait speed (in m/s)    | pre                                    | 0.67 ± 0.27                    | 0.86 ± 0.32                  | 0.65 ± 0.19                   | 0.36 ± 0.11                   |
|                        | post                                   | 0.69 ± 0.40                    | 0.94 ± 0.60                  | 0.60 ± 0.24                   | 0.49 ± 0.30                   |
|                        | Statistics (t-test)                    | t = -0.310, df = 31, p = 0.759 | T = -0.63, df = 8, p = 0.546 | t = 1.060, df = 18, p = 0.303 | t = -1.326, df = 3, p = 0.277 |

Legend: Gait speed was measured with the 4m gait test. M = mean, SD = standard deviation, df = degrees of freedom.
